# Supplementary material for: Circular RNA_101237 mediates anoxia/reoxygenation injury by targeting let-7a-5p/IGF2BP3 in cardiomyocytes
Source: PubMed Central journal article supplement — Int J Mol Med. 2019 Dec 23;45(2):451–60. doi: 10.3892/ijmm.2019.4441 (PMC6984805; doi:10.3892/ijmm.2019.4441), 2019-12-23
Supplement: Supplementary_Data.pdf [file Supplementary_Data.pdf]

Figure S1. Expression of let-7a-5p and IGF2BP3 following transfection. (A) RT-qPCR was performed to determine let-7a-5p levels following let-7a-5p inhibitor and mimic transfection in cardiomyocytes. (B and C) The mRNA and protein expression of IGF2BP3 was analyzed by (B) RT-qPCR and (C) western blot analysis following siRNA transfection in cardiomyocytes. \*P<0.05. IGF2BP3, insulin-like growth factor 2 mRNA-binding protein 3; RT-qPCR, reverse transcription-quantitative polymerase chain reaction; siRNA, small interfering RNA; NC, negative control.

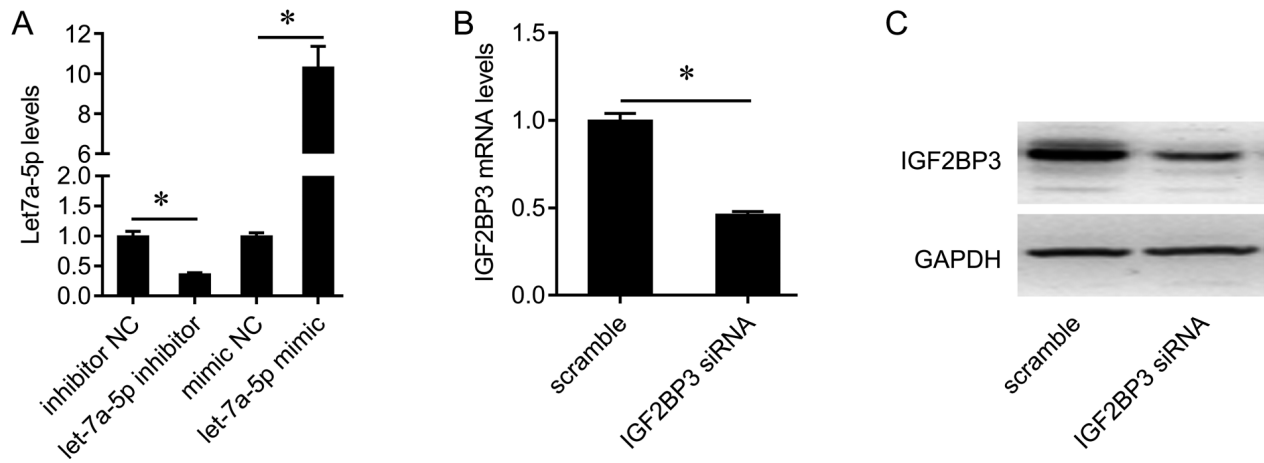

Table SI. Sequences of primers used in the reverse transcription-quantitative polymerase chain reaction.

| Genes          | Primer direction          |                          |
|----------------|---------------------------|--------------------------|
|                | Forward (5'-3')           | Reverse (5'-3')          |
| circRNA_104038 | CTGCAAGCTGAAGACCAACC      | GATAGGGTTGCTGCTGTTGG     |
| circRNA_405755 | CCAAGGTCTGCTTCTCATGC      | ATAAATGCTGGGCCTGGAGT     |
| circRNA_008053 | AGTGGCTGGAGATGAAGAAGT     | ACATACTGCTCTCCTCTTGGG    |
| circRNA_101237 | CCACCCAGGGAATCAAGACA      | GGTCCTGCATAGCCTGTTCT     |
| circRNA_101968 | TTCGGTTGAACAGCTCCAGG      | TGCCGAGATTATTCAGTCCCA    |
| circRNA_100714 | TTCTACAAGCTACCTGGGGC      | TGGGCACGACACATAGTACA     |
| circRNA_000558 | AGCCCGATGACATCTTACGA      | AGGAGGAGGAGGAGGAGATG     |
| circRNA_104209 | GAGGATCGCTGCAAATCTCC      | GCGCTCCCTCATTAATCAGG     |
| circRNA_101512 | TTCCTCCTAAGACTGAGCCG      | CAATCATGGCGAGCTGTGAG     |
| circRNA_400095 | GAGTTGCAGACAGGAGGGAT      | GCAGTGATGAGATGTCCTGG     |
| Let-7a-5p      | CGATTCAGTGAGGTAGTAGGTTGT  | TATGGTTGTTCTGCTCTCTGTCTC |
| IGF2BP3        | GGATCCGTGTCCAAGCAGAA      | GATGAACAGGTGCACGGTCT     |
| U6             | CTCGCTTCGGCAGCACA         | AACGCTTCACGAATTTGCGT     |
| GAPDH          | GTCGTGGAGTCTACTGGCGTCTTCA | TCGTGGTTCACACCCATCACAACA |

circRNA, circular RNA; IGF2BP3, insulin-like growth factor 2 mRNA-binding protein 3.
